# Supplementary material for: Impact of boundary layer stability on urban park cooling effect intensity
Source: Copernicus journal article supplement (doi:10.5194/egusphere-2024-1777), 2024-08-08
Supplement: Supplementary file [file egusphere-2024-1777-RC1-supplement.pdf]

This manuscript used meteorological surface station data and compact radiosondes to examine how the cooling effect of urban parks at night changes with park size and weather conditions in hot summer evenings. The findings are interesting. However, this study should address the following concerns before publication.

1、 Major concern: The findings of this study are very interesting and the evidence is very solid. However, it is recommended that the author should create a schematic diagram for each of the three different regimes, placing them in the conclusion section. This will not only help the author to refine the results but also help readers to understand the conclusions of this study more intuitively.

2、 Suggestion: If possible, in the future, it is recommended that the authors collect observational data from other cities to analyze whether cities with different terrains and climates also reach similar conclusions. This would be a very meaningful study.

3、 line 25: "near-by" should be "nearby"

4、 line 61: "Trees can provide efficient shading whereby reducing daytime air temperatures" should be "Trees can provide efficient shading, reducing daytime air temperatures"

5、 line 65: "The green infrastructures" should be "Green infrastructures"

6、 line 79: "e.g" should be "e.g."

7、 line 190: "Due to installation setup" should be "Due to the installation setup"

8、 line 239: "i.e." should be "i.e.,"

9、 line 332-333: "the advection" should be "advection"

10、 line 335: "July 19" should be "19 July"

11、 line466: "three turbulence regimes" should be "three types of turbulence regimes"

12、 line 610-611: "sensible heat fluxes" should be "sensible heat flux"

13、 line 768: "the temperature at all sites decreases to reach a minimal value the next morning at sunrise." Should be "the temperature at all sites decreases to a minimal value by the next morning at sunrise."

14、 line 811: "is" should be "are"

15、 line 848: "Hence in the" should be "Hence, in the"
